# Supplementary material
Source: PubMed Central journal article supplement (PMC9250611)
Supplement: NIHMS1806855-supplement-2.pdf [file NIHMS1806855-supplement-2.pdf]

**Supplementary Table S2.** Distribution of cross-classified race and ethnicity in the population when categories prioritize Hispanic ethnicity versus racial group

| Ethnicity prioritized categories<br>(Main Analysis) | Race prioritized categories<br>(Supplemental Table 3) |       |       |                |      |          |
|-----------------------------------------------------|-------------------------------------------------------|-------|-------|----------------|------|----------|
|                                                     | AIAN                                                  | Asian | Black | Hispanic White | NHPI | NH White |
| NH AIAN                                             | 631                                                   | 0     | 0     | 0              | 0    | 0        |
| NH Asian                                            | 0                                                     | 1,828 | 0     | 0              | 0    | 0        |
| NH Black                                            | 0                                                     | 0     | 821   | 0              | 0    | 0        |
| Hispanic all races                                  | 258                                                   | 148   | 180   | 8,143          | 62   | 0        |
| NH NHPI                                             | 0                                                     | 0     | 0     | 0              | 271  | 0        |
| NH White                                            | 0                                                     | 0     | 0     | 0              | 0    | 148,462  |

Abbreviations: AIAN=American Indian or Alaska Native; NHPI=Native Hawaiian or Pacific Islander; NH=non-Hispanic
