# Supplementary material
Source: PubMed Central journal article supplement (PMC9250611)
Supplement: NIHMS1806855-supplement-6.pdf [file NIHMS1806855-supplement-6.pdf]

**Supplementary Table S6. Multivariable-adjusted<sup>a</sup> association between body mass index (BMI) and mammographic density (MD)<sup>b</sup> by race and ethnicity and hormone therapy (HT) use among women ages 45 and older**

| BMI                          | All        |             |                   | AIAN       |             |                   | Asian      |             |                   | Black      |             |                   | Hispanic   |             |                   | NHPI       |             |                   | White      |             |                   |
|------------------------------|------------|-------------|-------------------|------------|-------------|-------------------|------------|-------------|-------------------|------------|-------------|-------------------|------------|-------------|-------------------|------------|-------------|-------------------|------------|-------------|-------------------|
|                              | Low MD (n) | High MD (n) | RR (95% CI)       | Low MD (n) | High MD (n) | RR (95% CI)       | Low MD (n) | High MD (n) | RR (95% CI)       | Low MD (n) | High MD (n) | RR (95% CI)       | Low MD (n) | High MD (n) | RR (95% CI)       | Low MD (n) | High MD (n) | RR (95% CI)       | Low MD (n) | High MD (n) | RR (95% CI)       |
| <b>All women ages ≥45</b>    |            |             |                   |            |             |                   |            |             |                   |            |             |                   |            |             |                   |            |             |                   |            |             |                   |
| <25                          | 21,936     | 29,601      | (ref)             | 62         | 106         | (ref)             | 208        | 687         | (ref)             | 75         | 121         | (ref)             | 800        | 1,388       | (ref)             | 12         | 31          | (ref)             | 20,779     | 27,268      | (ref)             |
| ≥25<30                       | 25,252     | 15,294      | 0.68 (0.67, 0.69) | 88         | 62          | 0.65 (0.52, 0.82) | 109        | 105         | 0.65 (0.56, 0.74) | 124        | 59          | 0.52 (0.41, 0.66) | 1,075      | 818         | 0.69 (0.65, 0.73) | 31         | 24          | 0.62 (0.44, 0.87) | 23,825     | 14,226      | 0.68 (0.67, 0.69) |
| ≥30                          | 20,486     | 6,666       | 0.43 (0.42, 0.44) | 101        | 22          | 0.28 (0.19, 0.41) | 41         | 25          | 0.50 (0.36, 0.68) | 141        | 41          | 0.36 (0.27, 0.48) | 907        | 368         | 0.46 (0.42, 0.50) | 56         | 20          | 0.36 (0.23, 0.55) | 19,240     | 6,190       | 0.43 (0.42, 0.44) |
| p-trend                      |            |             | <0.001            |            |             | <0.001            |            |             | <0.001            |            |             | <0.001            |            |             | <0.001            |            |             | 0.002             |            |             | <0.001            |
| <b>Never HT</b>              |            |             |                   |            |             |                   |            |             |                   |            |             |                   |            |             |                   |            |             |                   |            |             |                   |
| <25                          | 18,496     | 25,611      | (ref)             | *          | *           | (ref)             | 192        | 637         | (ref)             | *          | 110         | (ref)             | 700        | 1,271       | (ref)             | *          | *           | (ref)             | 17,471     | 23,470      | (ref)             |
| ≥25<30                       | 21,159     | 12,816      | 0.67 (0.66, 0.69) | 72         | *           | 0.70 (0.55, 0.88) | 100        | 96          | 0.65 (0.56, 0.75) | 111        | *           | 0.50 (0.39, 0.64) | 951        | 734         | 0.68 (0.64, 0.73) | *          | *           | 0.57 (0.39, 0.84) | 19,896     | 11,861      | 0.68 (0.66, 0.69) |
| ≥30                          | 17,148     | 5,549       | 0.43 (0.42, 0.44) | *          | *           | 0.26 (0.17, 0.40) | *          | *           | 0.52 (0.38, 0.72) | 126        | *           | 0.33 (0.24, 0.46) | 798        | 324         | 0.45 (0.41, 0.50) | *          | *           | 0.33 (0.21, 0.53) | 16,043     | 5,132       | 0.43 (0.42, 0.44) |
| p-trend                      |            |             | <0.001            |            |             | <0.001            |            |             | <0.001            |            |             | <0.001            |            |             | <0.001            |            |             | 0.002             |            |             | <0.001            |
| <b>Past HT</b>               |            |             |                   |            |             |                   |            |             |                   |            |             |                   |            |             |                   |            |             |                   |            |             |                   |
| <25                          | 1,335      | 1,378       | (ref)             | *          | *           | (ref)             | *          | 24          | (ref)             | *          | *           | (ref)             | 41         | 37          | (ref)             | *          | *           | (ref)             | 1,284      | 1,306       | (ref)             |
| ≥25<30                       | 1790       | 904         | 0.67 (0.63, 0.72) | *          | *           | **                | *          | *           | 0.52 (0.27, 0.99) | *          | *           | 0.53 (0.17, 1.66) | 59         | 29          | 0.68 (0.47, 0.99) | *          | *           | **                | 1,713      | 862         | 0.67 (0.63, 0.72) |
| ≥30                          | 1627       | 445         | 0.42 (0.38, 0.46) | *          | *           | **                | *          | *           | 0.42 (0.08, 2.22) | *          | *           | 0.77 (0.23, 2.53) | 52         | 21          | 0.57 (0.37, 0.88) | *          | *           | **                | 1,562      | 415         | 0.41 (0.37, 0.45) |
| p-trend                      |            |             | <0.001            |            |             | **                |            |             | 0.17              |            |             | 0.60              |            |             | 0.020             |            |             | **                |            |             | <0.001            |
| <b>Current HT</b>            |            |             |                   |            |             |                   |            |             |                   |            |             |                   |            |             |                   |            |             |                   |            |             |                   |
| <25                          | 2,105      | 2,612       | (ref)             | *          | *           | (ref)             | *          | 25          | (ref)             | *          | *           | (ref)             | 59         | 80          | (ref)             | *          | *           | (ref)             | 2,024      | 2,492       | (ref)             |
| ≥25<30                       | 2,303      | 1,574       | 0.74 (0.70, 0.77) | *          | *           | 0.35 (0.14, 0.87) | *          | *           | 0.71 (0.45, 1.11) | *          | *           | **                | 65         | 55          | 0.80 (0.63, 1.02) | *          | *           | **                | 2,216      | 1,503       | 0.73 (0.70, 0.77) |
| ≥30                          | 1,711      | 672         | 0.50 (0.47, 0.54) | *          | *           | 0.23 (0.04, 1.19) | *          | *           | **                | *          | *           | **                | 57         | 23          | 0.50 (0.35, 0.74) | *          | *           | **                | 1,635      | 643         | 0.51 (0.47, 0.54) |
| p-trend                      |            |             | <0.001            |            |             | 0.038             |            |             | 0.33              |            |             | **                |            |             | <0.001            |            |             | **                |            |             | <0.001            |
| p-heterogeneity <sup>c</sup> |            |             | <0.001            |            |             | 0.45              |            |             | 0.75              |            |             | 0.24              |            |             | 0.56              |            |             | **                |            |             | <0.001            |

Abbreviations: AIAN=non-Hispanic American Indian or Alaska Native; Asian=non-Hispanic Asian; Black=non-Hispanic Black; NHPI=non-Hispanic Native Hawaiian or Pacific Islander; White=non-Hispanic White

\*Consistent with Utah Population Database confidentiality policies, we have masked low counts (n<11) and any counts that could be used to re-create the low counts.

\*\*Model does not converge or all counts are 0.

<sup>a</sup>Multivariable models are adjusted for age (continuous), education (less than high school or high school diploma, more than high school, missing), and parity (0 births in Utah, 1 birth in Utah, 2+births in Utah, parous with number of births not known). The model for the full population, "All," is additionally adjusted for the combined race and ethnicity variable.

<sup>b</sup>Low MD is defined as BI-RADS A or B, and high MD is defined as BI-RADS C or D.

<sup>c</sup>Test for heterogeneity is a likelihood ratio test comparing models with and without interaction terms between HT and BMI. For each race and ethnicity group, tests for interaction compare only those categories of HT use for which results are displayed.
